# Supplementary material for: A facile method of activating graphitic carbon nitride for enhanced photocatalytic activity
Source: Royal Society of Chemistry journal article supplement (doi:10.1039/c5cp05186j), 2015-01-01
Supplement: c5cp05186j1.pdf [file c5cp05186j1.pdf]

## Supplementary Information

### A Facile Method of Activating Graphitic Carbon Nitride for Enhanced Photocatalytic Activity

Yongliang Liao,<sup>a</sup> Shenmin Zhu,<sup>\*a</sup> Zhixin Chen,<sup>b</sup> Xianghong Lou,<sup>a</sup> and Di Zhang<sup>a</sup>

<sup>a</sup>State Key Laboratory of Metal Matrix Composites, Shanghai Jiao Tong University, 800 Dongchuan Road, Shanghai 200240, People's Republic of China

<sup>b</sup>The Faculty of Engineering and Information Sciences, University of Wollongong, Wollongong, New South Wales 2522, Australia

#### Corresponding Author

\*e-mail: smzhu@sjtu.edu.cn

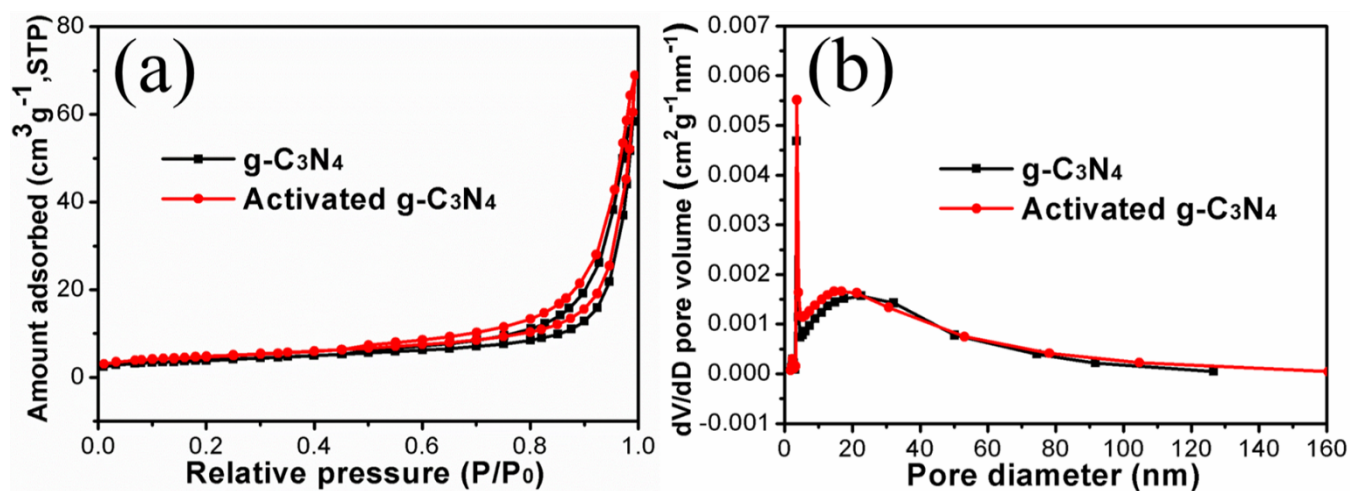

**Figure S1.** (a) N<sub>2</sub> adsorption-desorption isotherms and (b) pore size distributions of g-C<sub>3</sub>N<sub>4</sub> and activated g-C<sub>3</sub>N<sub>4</sub>.

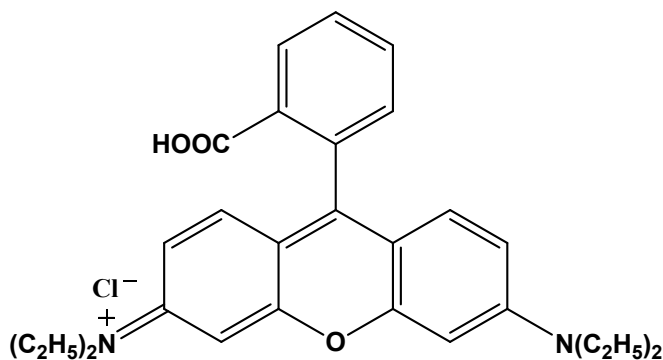

**Figure S2.** Molecular formula of Rhodamine B.

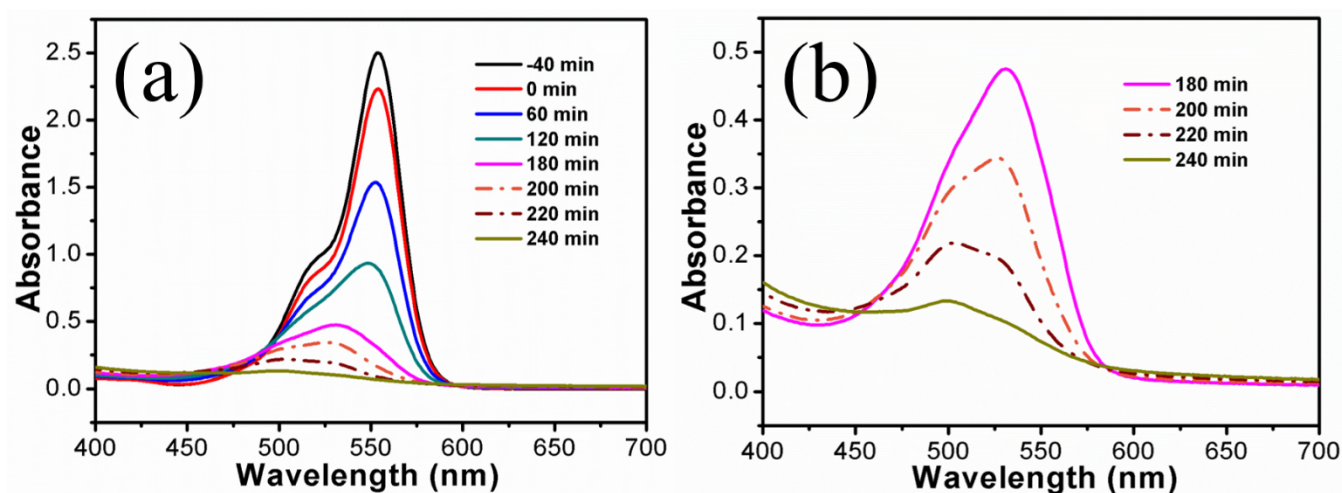

**Figure S3.** Temporal UV-visible adsorption spectral changes for the RhB solution during the photocatalytic degradation reactions of g-C<sub>3</sub>N<sub>4</sub> during (a) -40-240 min and (b) 180-240 min.

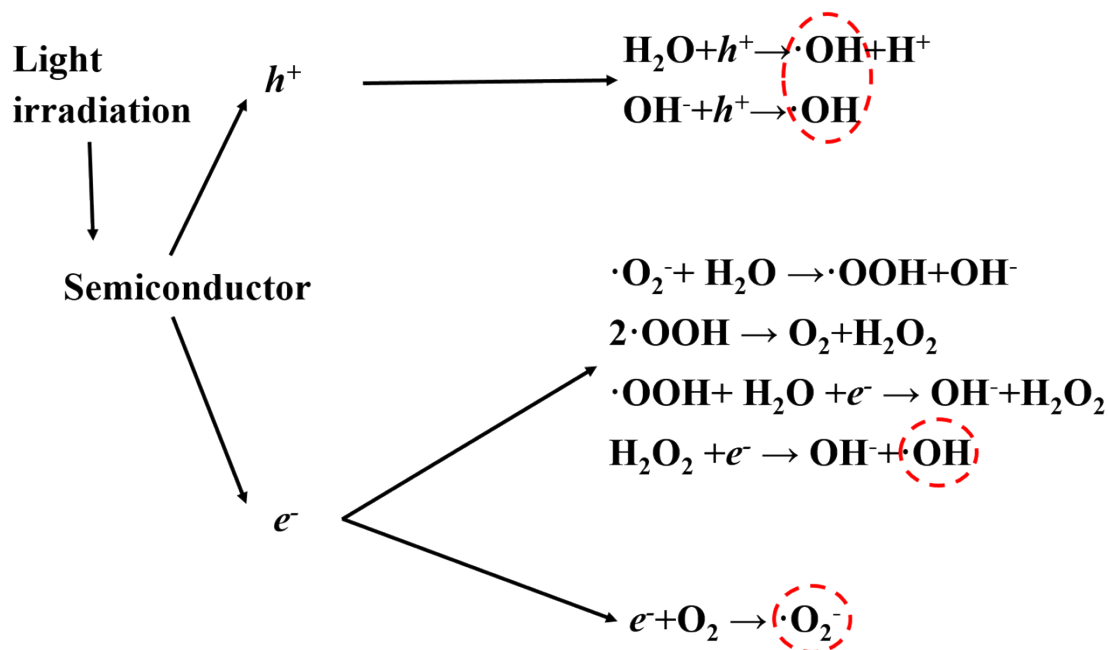

**Figure S4.** Summary of photocatalytic mechanism.

**Table S1.** Commonly used scavengers for different species.

| Species                     | Commonly used scavengers                          |
|-----------------------------|---------------------------------------------------|
| $h^+$                       | Triethanolamine (TEOA), Ammonium oxalate, EDTA–Na |
| $e^-$                       | Dimethyl sulfoxide (DMSO)                         |
| $\cdot\text{OH}$ radical    | Isopropanol, n-butyl alcohol                      |
| $\cdot\text{O}_2^-$ radical | Nitrogen ( $\text{N}_2$ ), Benzoquinone           |

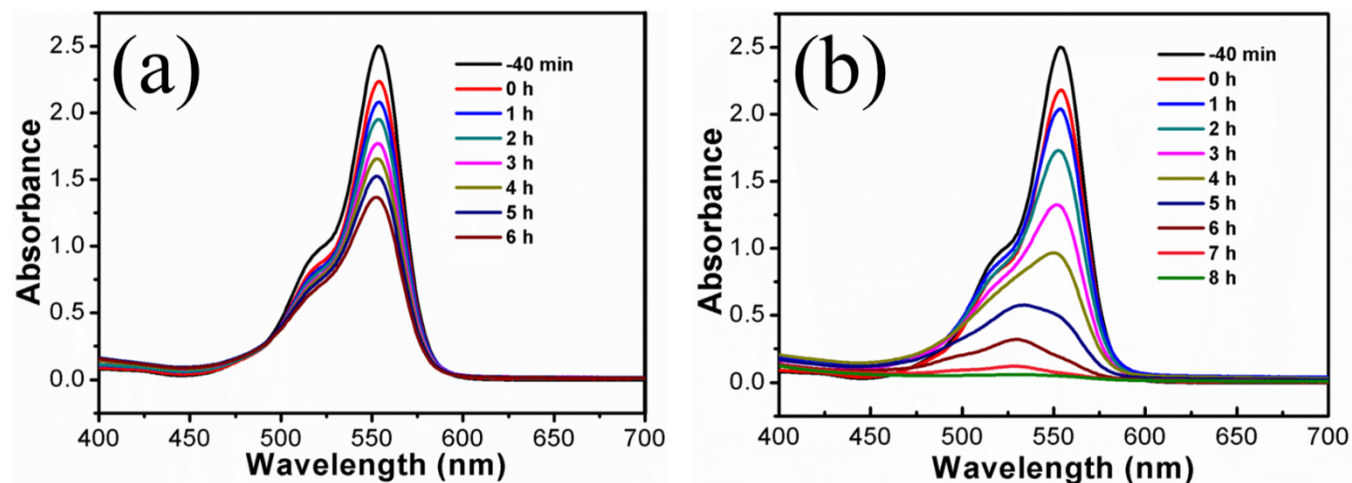

**Figure S5.** Temporal UV-visible adsorption spectral changes for the RhB solution during the photocatalytic degradation reactions via the activated  $\text{g-C}_3\text{N}_4$  including (a) 2 mmol of TEOA (b) 0.5 mmol of TEOA.

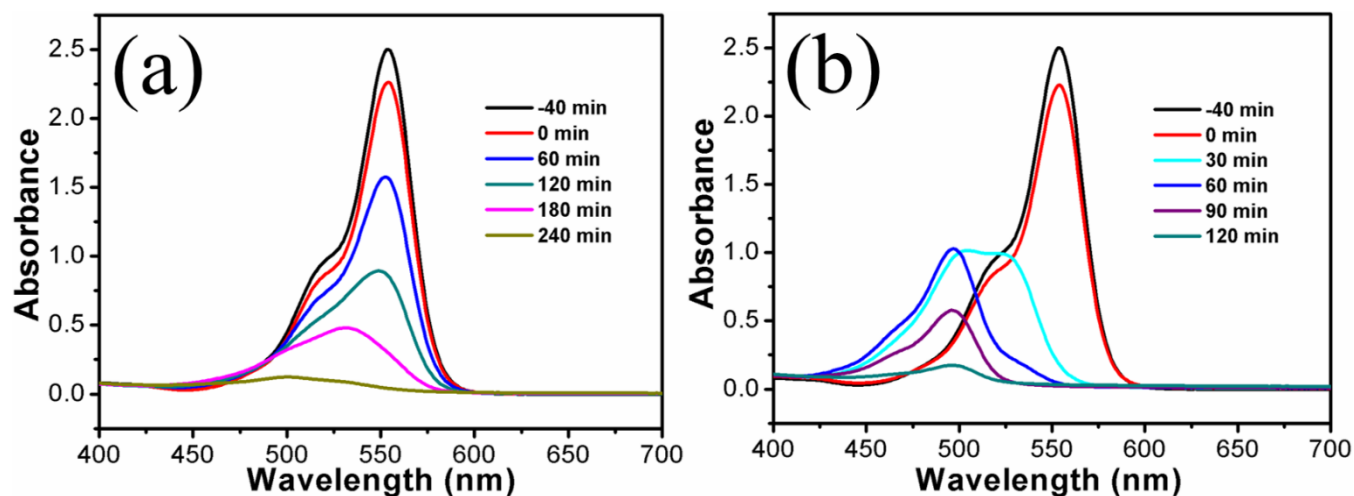

**Figure S6.** Temporal UV-visible adsorption spectral changes for the RhB solution including 2 mmol n-butanol during the photocatalytic degradation reactions of (a)  $\text{g-C}_3\text{N}_4$  and (b) activated  $\text{g-C}_3\text{N}_4$ .

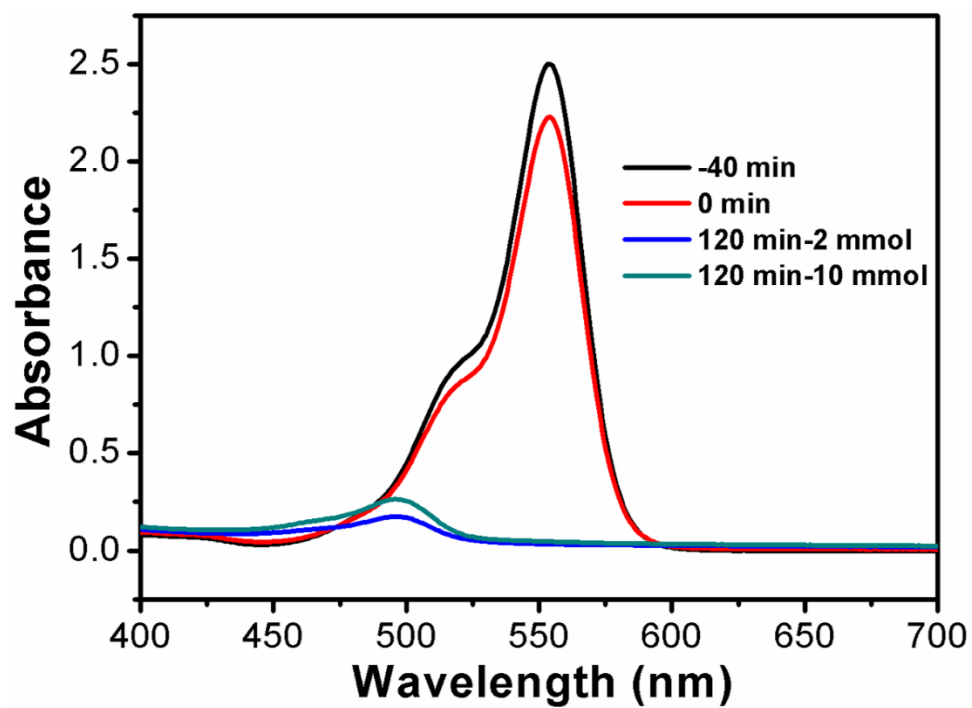

**Figure S7.** Temporal UV-visible adsorption spectral changes for the RhB solution during the photocatalytic degradation reactions of activated g-C<sub>3</sub>N<sub>4</sub> including different content n-butanol.
